# Supplementary material for: Free energy landscapes of the encapsulation mechanism of DNA nucleobases onto carbon nanotubes
Source: Royal Society of Chemistry journal article supplement (doi:10.1039/c3ra45033c), 2013-11-14
Supplement: c3ra45033c.pdf [file c3ra45033c.pdf]

## SUPPORTING INFORMATION

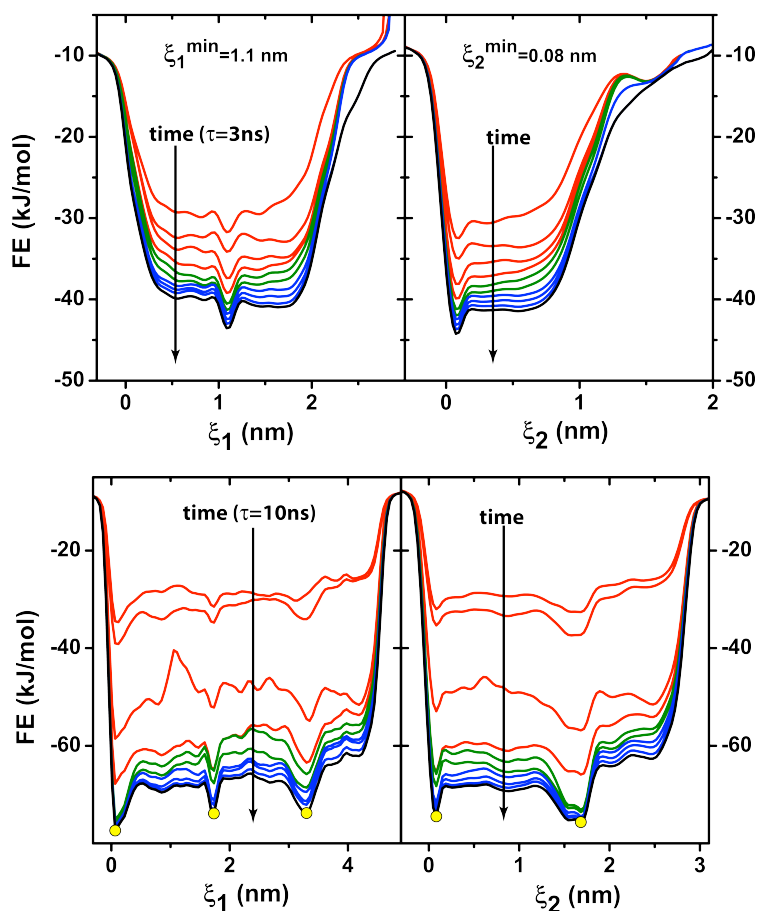

**Figure S11.** Convergence profiles of the metadynamics order parameters: *top*) A@hydrophobic (16,0) SWCNT and *bottom*) T@electrically charged (23,0) SWCNT. Each line corresponds to  $\tau$  ns integration time of eqn.6 performed for each order parameter,  $FE(\zeta) = -\frac{1}{\tau} \int_{t_{tot}-\tau}^{t_{tot}} V(\zeta, t)$ , and the yellow dots are the three relative free energy minima. Note that the overall  $FE(\xi_1)$  and  $FE(\xi_2)$  lines, depicted in black, overlap the final  $\tau$  ns timewindow. It becomes clear that the free-energy profiles are essentially converged to the corresponding minima; the energetic landscapes recorded in Fig. 2 and Fig.4 are accurate representations of the thermodynamical free-energy changes associated with the confinement process.

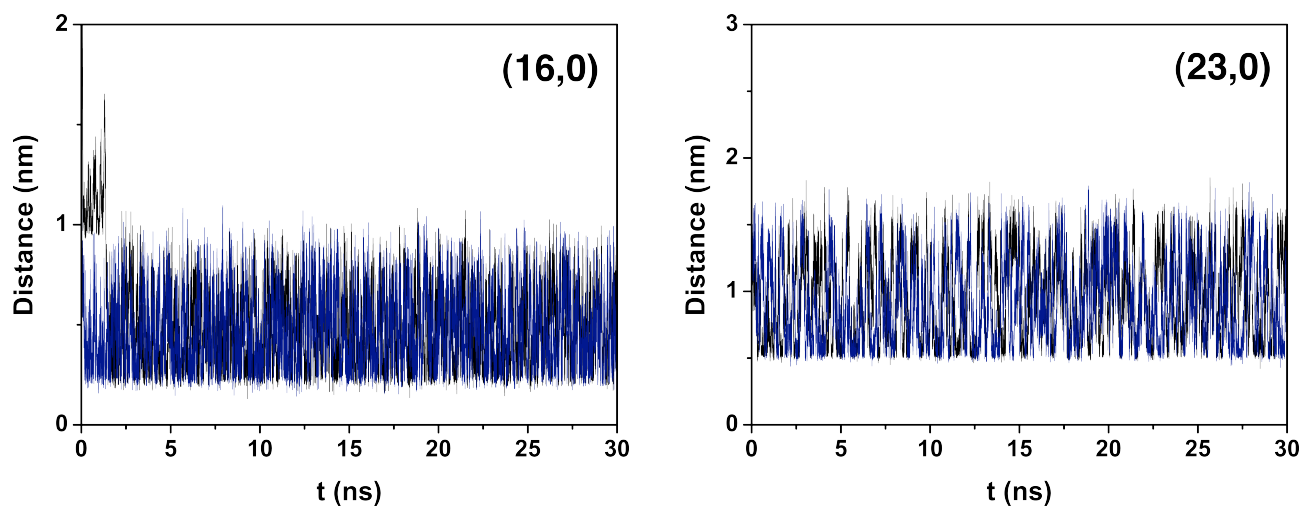

**Figure SI2.** Center of mass distance between nucleobase and hydrophobic SWCNTs observed in the unbiased calculations: *black*) adenine, *blue*) thymine.

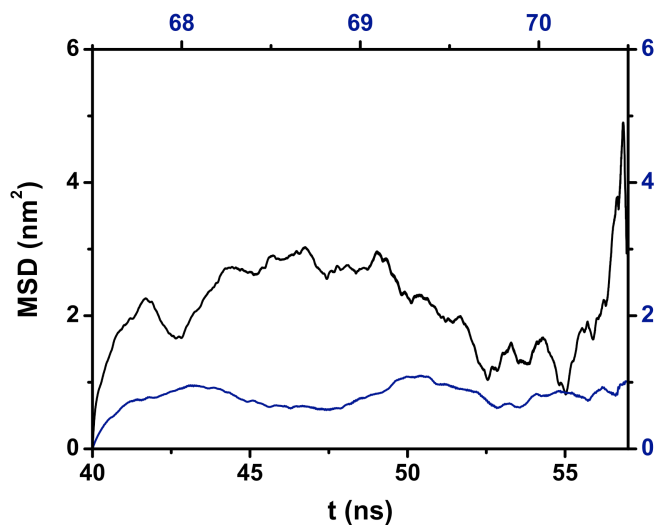

**Figure SI3.** Mean squared displacement of a nucleobase c.o.m. confined in a (23,0) electrically charged carbon nanotube,  $MSD = \langle \|\mathbf{r}(t) - \mathbf{r}(0)\|^2 \rangle$ , where  $\mathbf{r}(t)$  is the NB positional vector at time  $t$ , and the triangular brackets denote an ensemble average: *black*) adenine and *blue*) thymine.

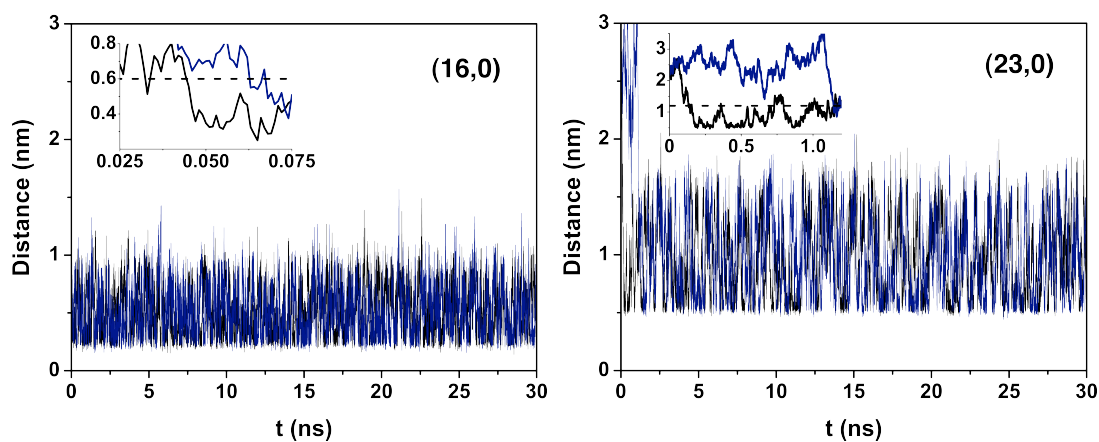

**Figure SI4.** Center of mass distance between nucleobase and hydrophobic SWCNTs: *black*) adenine, *blue*) thymine. The dashed line in the inset magnifications indicates an exact distance between nucleobase and SWCNT center of 0.6 nm (16,0) and 1.2 nm (23,0).

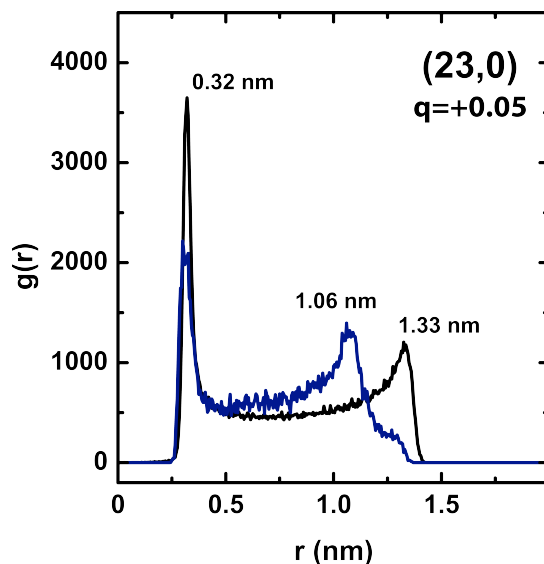

**Figure SI5.** Radial distribution functions between the nucleobase surface and the electrically charged (23,0) nanotube, calculated during the occurrence of a confinement event: *black*) adenine, *blue*) thymine.

**Animations SI1-SI2.** The first 1 ns of calculations is exemplified here for adenine in contact with the hydrophobic (23,0) nanotube; each  $s$  in the animations corresponds to  $3.03 \times 10^{-2}$  ns of real (simulation) time.  $\text{H}_2\text{O}$  molecules are represented by a red sphere corresponding to their O atom and the (23,0) SWCNT is depicted by a grey mesh. The annular concentric layers surrounding the solid walls, devoid of particles, are a direct consequence of the graphitic C atoms collision diameter. Notice the almost perfect parallel alignment between the NB and the inner walls, always maintained throughout confinement.
